# Supplementary material for: HMGA1 promotes the progression of esophageal squamous cell carcinoma by elevating TKT-mediated upregulation of pentose phosphate pathway
Source: PubMed Central journal article supplement (PMC11289123; doi:10.1038/s41419-024-06933-x), 2024-07-30
Supplement: 41419_2024_6933_MOESM2_ESM.pdf [file 41419_2024_6933_MOESM2_ESM.pdf]

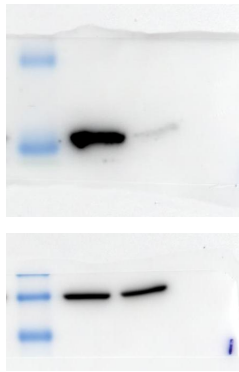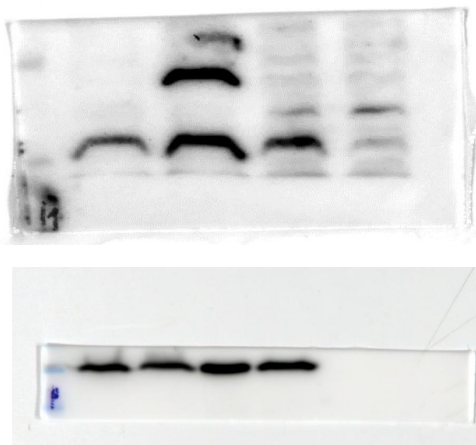

**A**

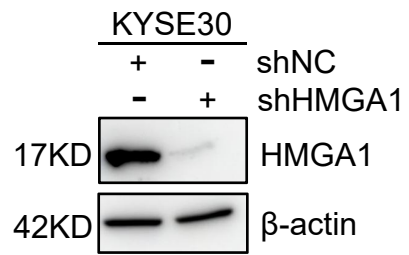

**G**

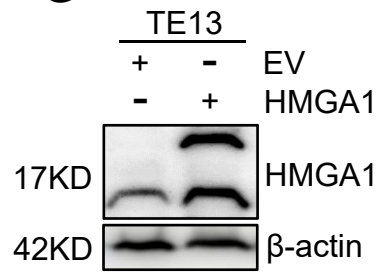

**Fig 2**

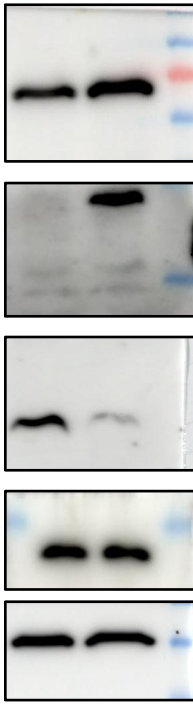

**F**

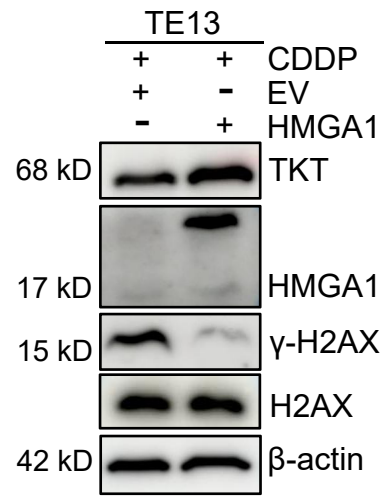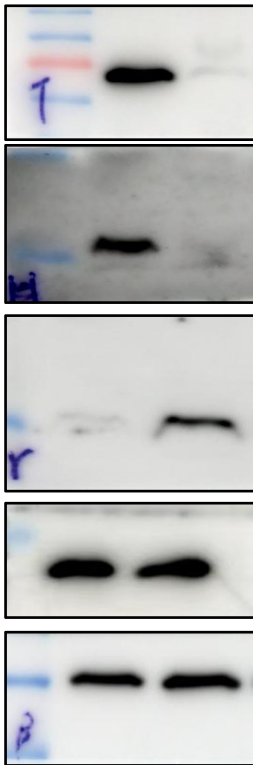

**I**

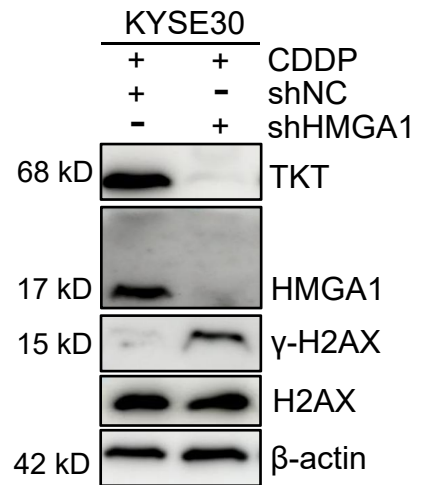

**Fig 4**

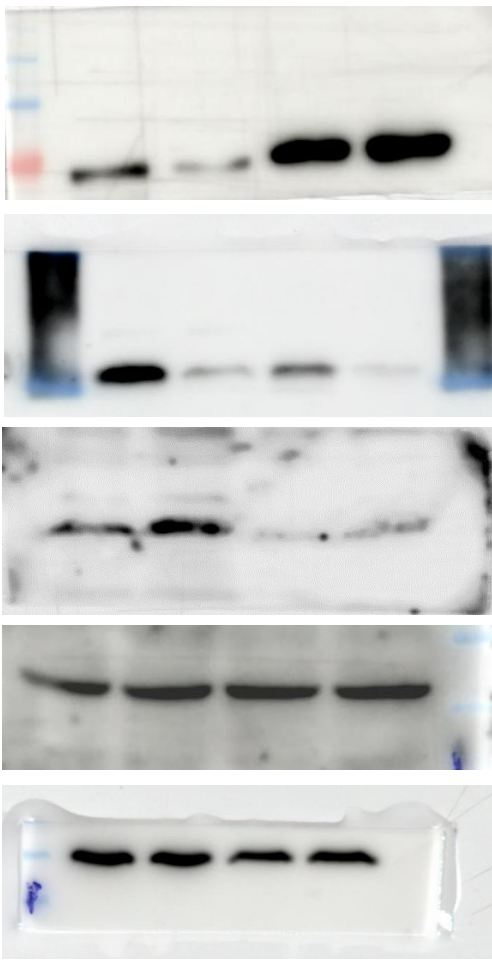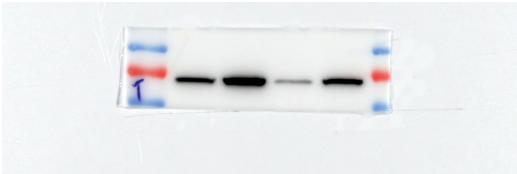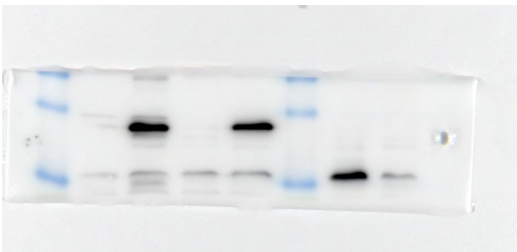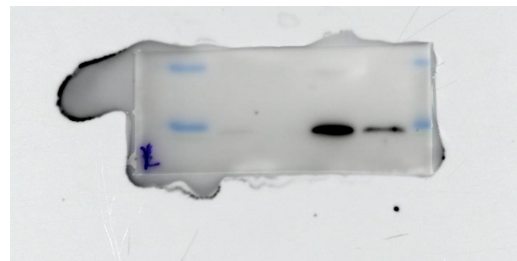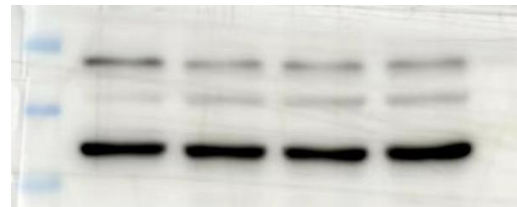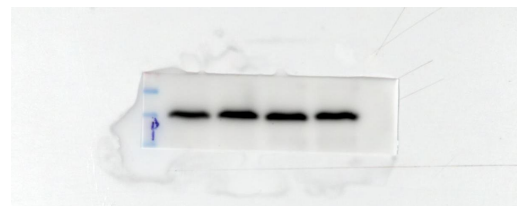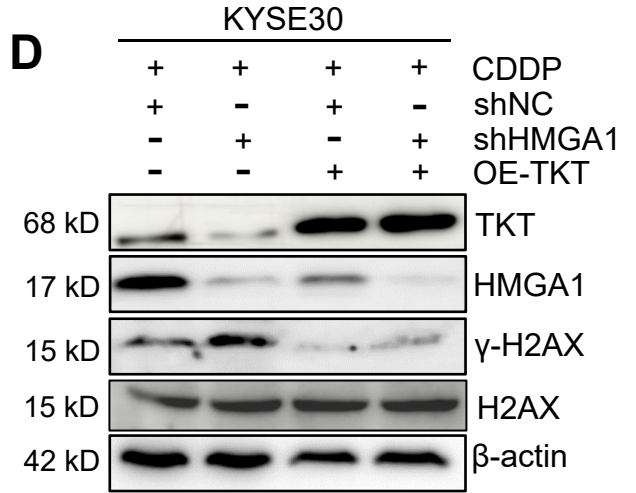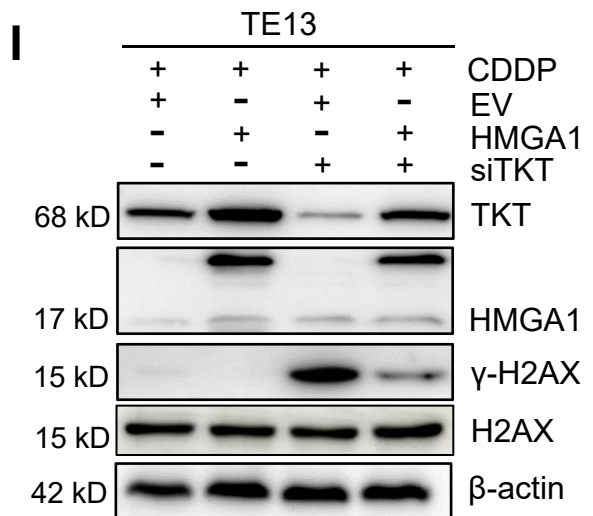

**Fig 5**

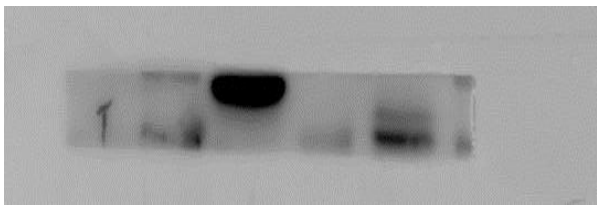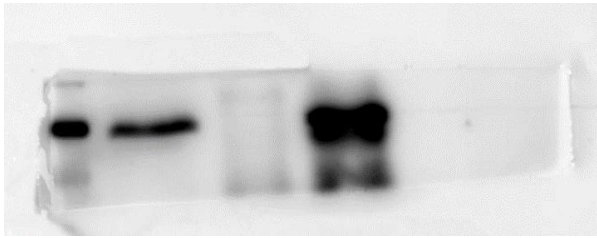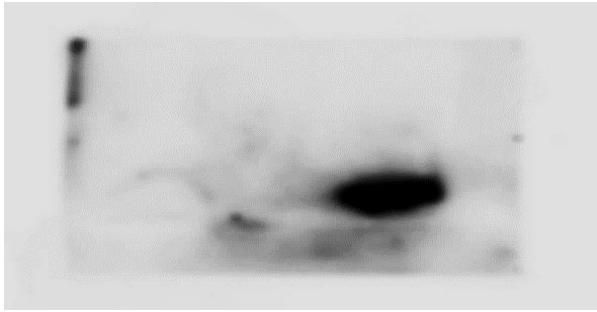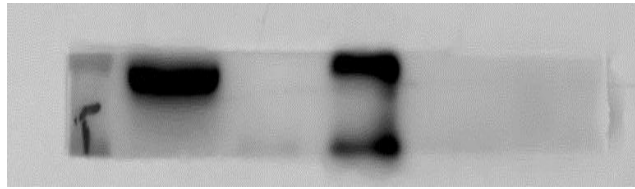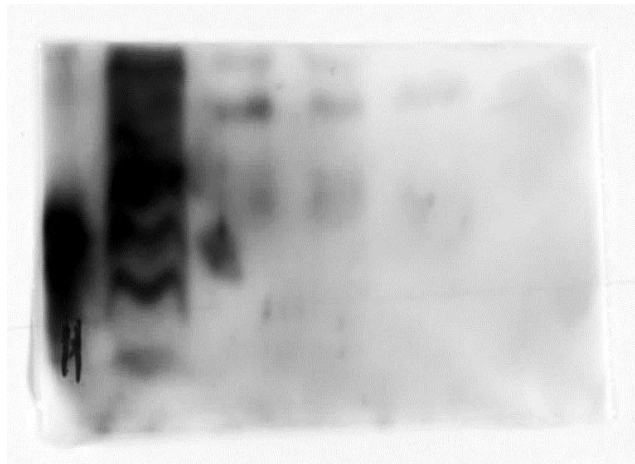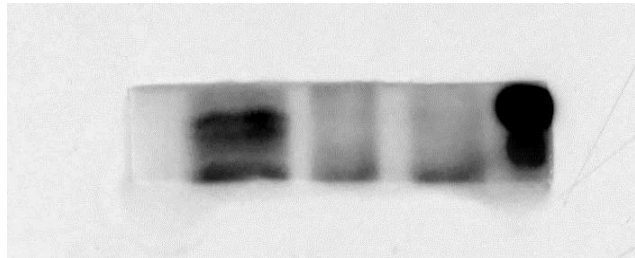

**A**

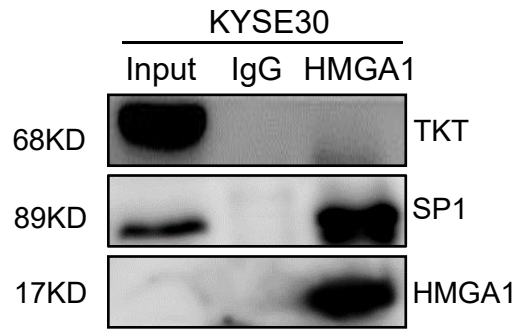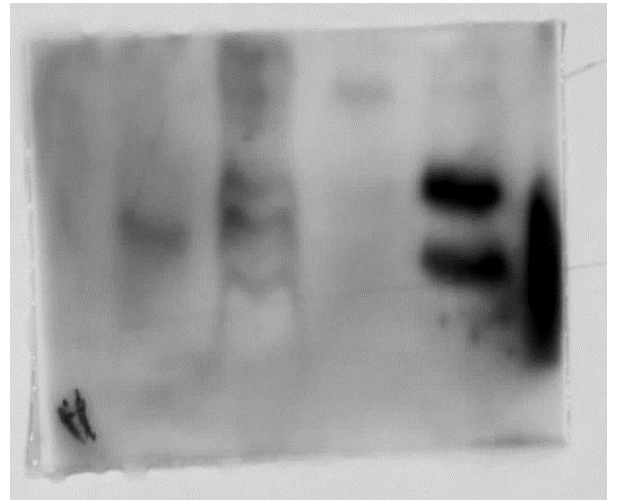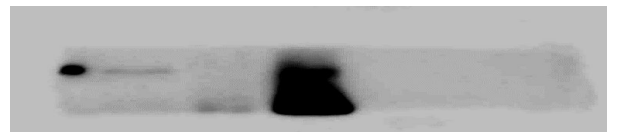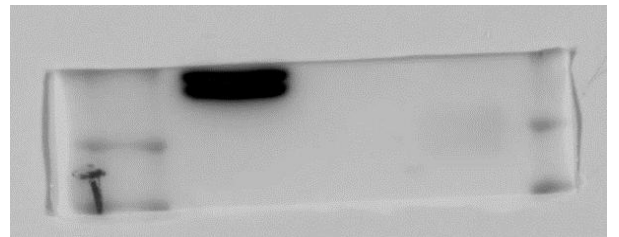

**C**

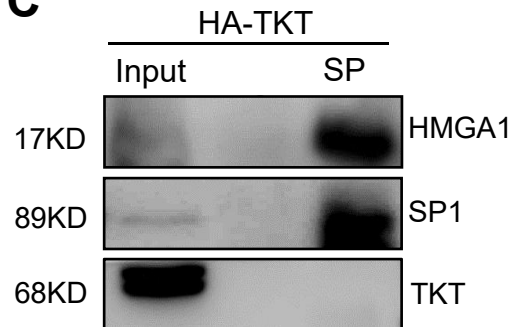

**B**

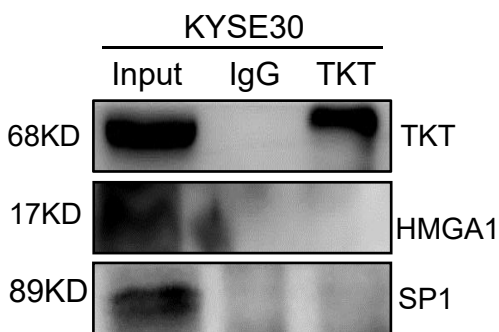

**Fig 6**

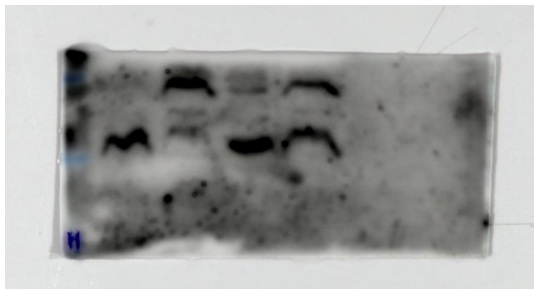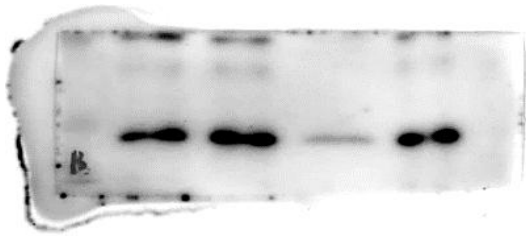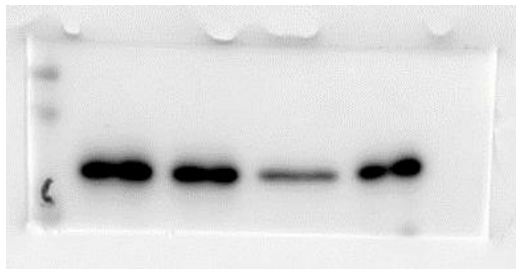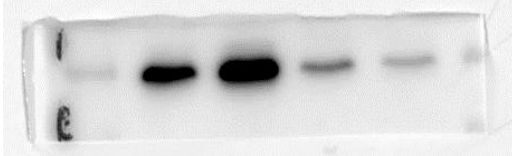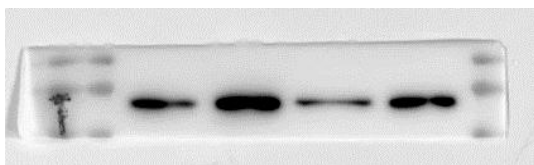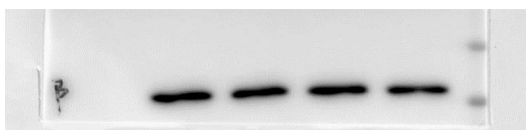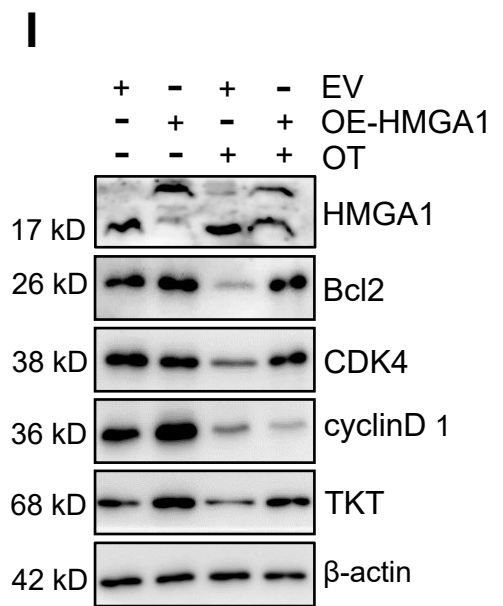

**Fig 7**



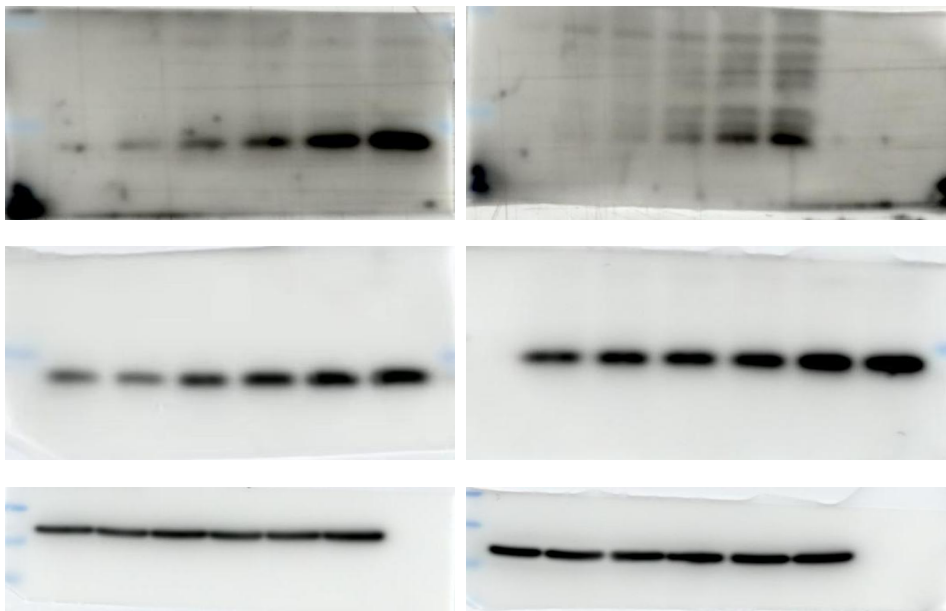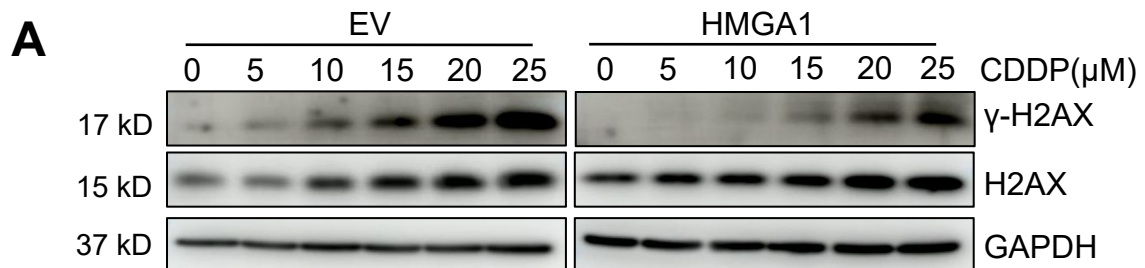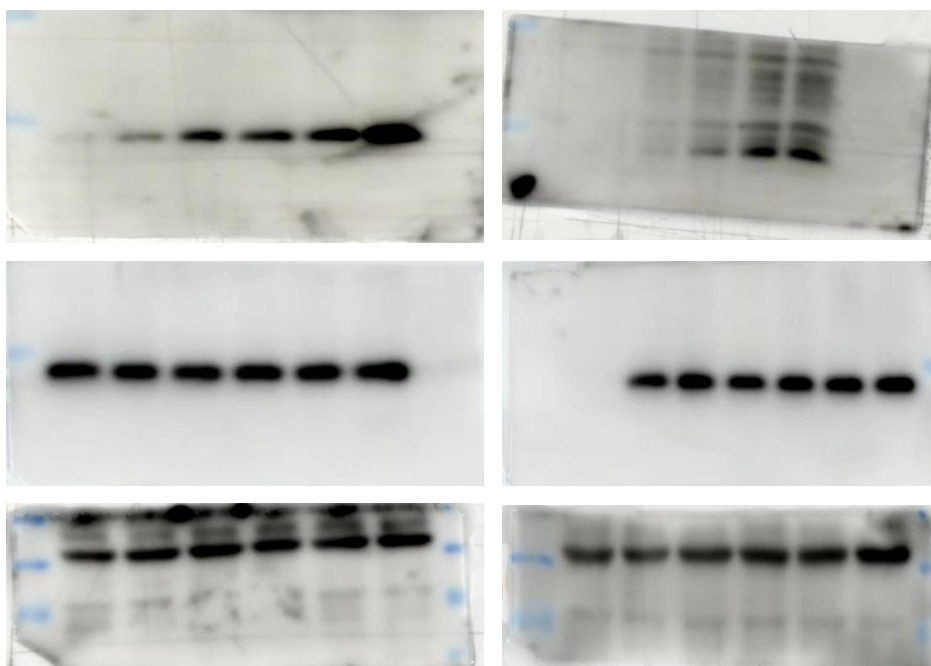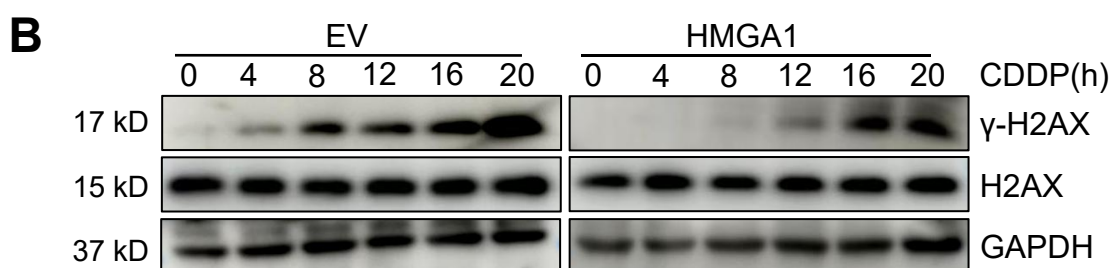

**Fig S4**

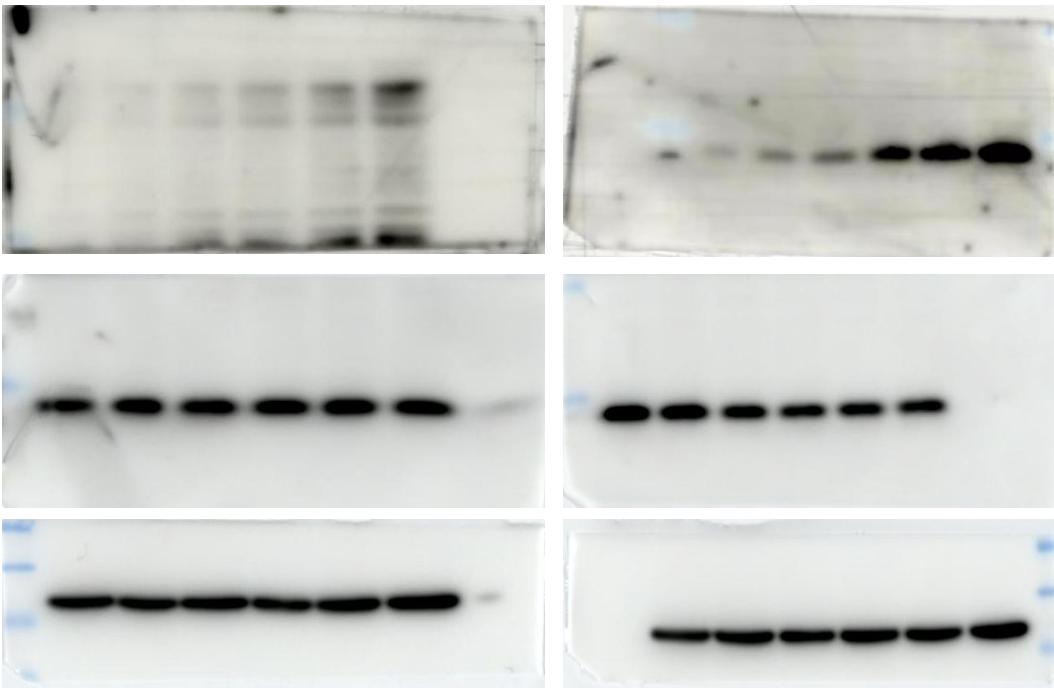

**C**

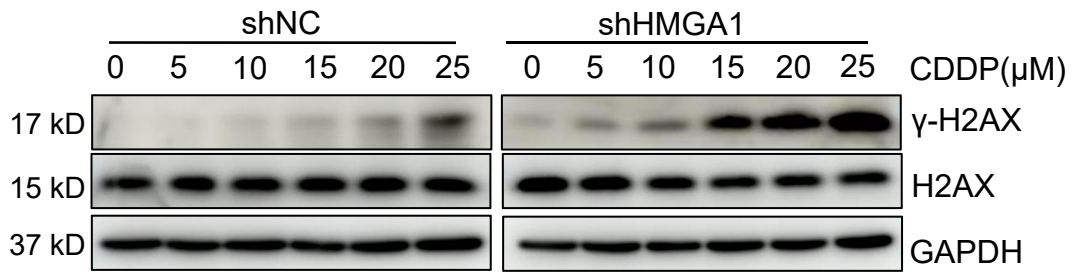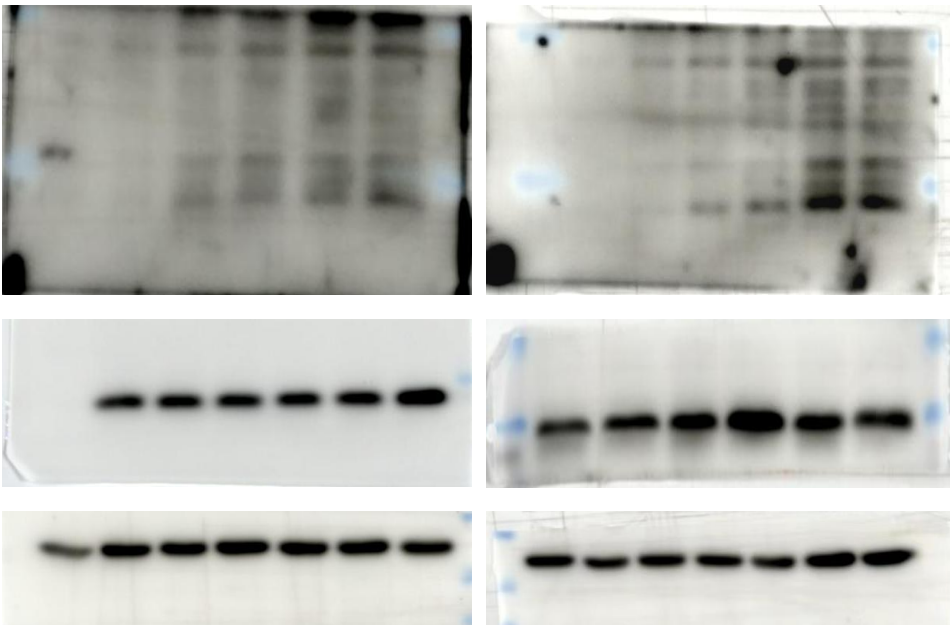

**D**

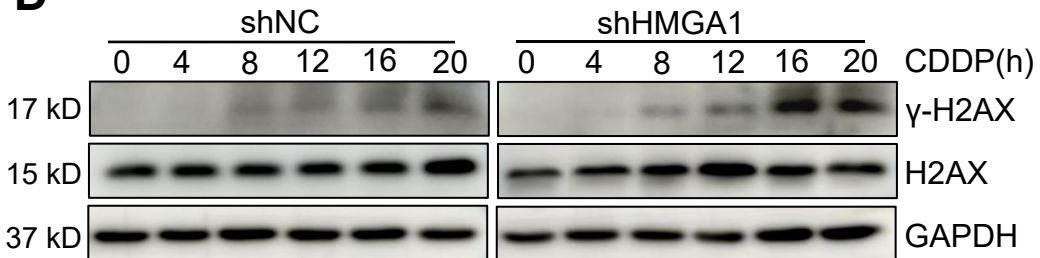

**Fig S4**

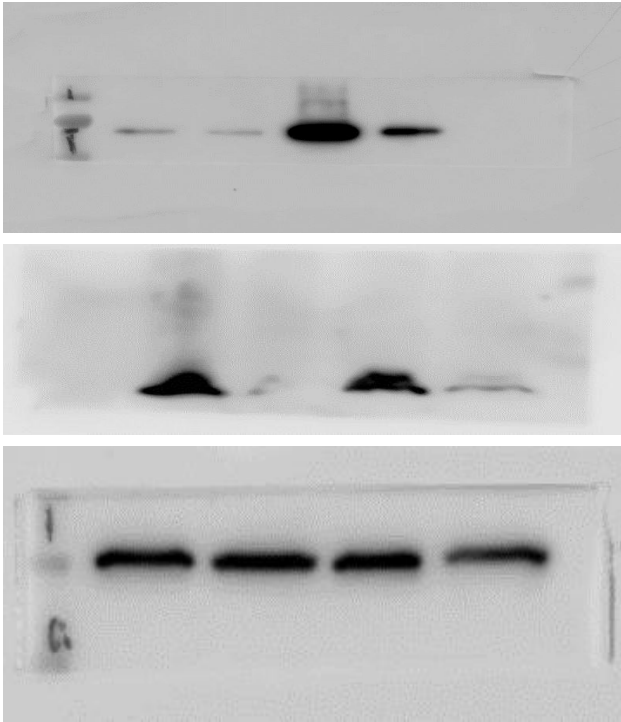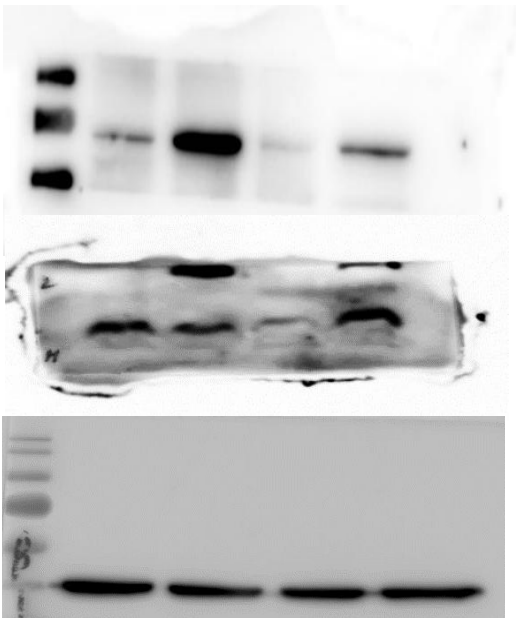

**D**

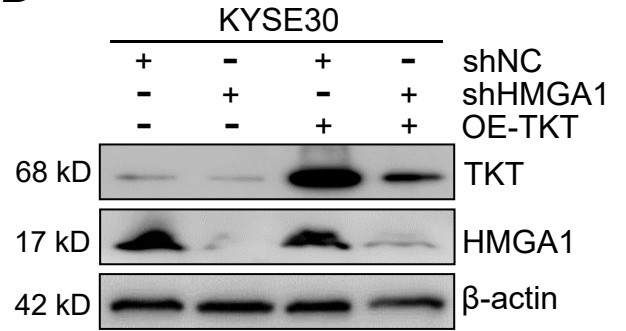

**F**

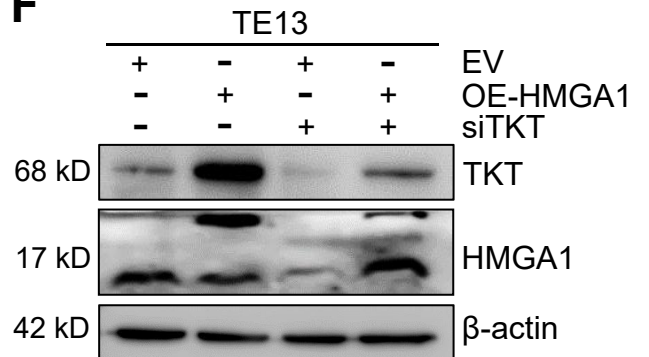

**Fig S5**
